# Supplementary material for: Promotion of uterine reconstruction by a tissue-engineered uterus with biomimetic structure and extracellular matrix microenvironment
Source: PubMed Central journal article supplement — Sci Adv. 2023 Nov 15;9(46):eadi6488. doi: 10.1126/sciadv.adi6488 (PMC10651121; doi:10.1126/sciadv.adi6488), 2023-11-15
Supplement: sciadv.adi6488_sm.pdf [file sciadv.adi6488_sm.pdf]

Supplementary Materials for  
**Promotion of uterine reconstruction by a tissue-engineered uterus with  
biomimetic structure and extracellular matrix microenvironment**

Long-mei Zhao *et al.*

Corresponding author: Hui-qi Xie, xiehuiqi@scu.edu.cn

*Sci. Adv.* **9**, eadi6488 (2023)  
DOI: 10.1126/sciadv.adi6488

**This PDF file includes:**

Supplementary Methods  
Figs. S1 to S10  
Table S1  
Data S1 and S2

## **Method**

### **The preparation of small intestinal submucosa (SIS)**

In brief, the procedure involved mechanical disassociation, degrease, enzyme digestion, detergent treatment, lyophilization and sterilization. The porcine small intestinal was cut in length of approximately 10 cm each and washed with a saline solution. Firstly, SIS was obtained by mechanical removal of the tunica serosa and tunica muscularis, then cleaned by washing continuously with a saline solution. Secondly, the submucous membrane was submerged in a solution containing methanol and chloroform (1:1, V/V) in a fume cupboard for 12 h and rinsed with the deionized water to remove the organic solvents. Thirdly, the membrane was incubated in the 0.05% trypsin/0.05% ethylenediamine tetraacetic acid at 37 °C for 12 h and rinsed with a saline solution continuously to remove the trypsin. Subsequently, the membrane was further treated with 0.5% sodium dodecylsulphate (SDS) in 0.9% sodium chloride by continuously shaking on a shaker for 4 h. Then, the detergent was removed by thoroughly rinsing with a saline solution. Finally, the submucous membrane was soaked into 0.1% peroxyacetic acid and 20% ethanol for 30 min and rinsed with saline solution. All the samples were frozen-dried under 70 °C with a lyophilizer (CHRIST, GAMMA 2-16 LSC, Germany).

### **The preparation of PU/SIS composites**

Briefly, PU prepolymer was synthesized through a bulk polymerization procedure. IPDI (21.48 g, 96.67 mmol), PTMG 1000 (33.33 g, 33.33 mmol), and 0.2 mL of stannous octoate were mixed together and stirred at a temperature of 74 °C for 3 h, after which the solution temperature was reduced to 54 °C. Subsequently, DMBA (4.94 g, 33.33 mmol) reagent was added to the resulting mixture, and the reaction was extended for three additional hours. Then, the obtained prepolymer was ionized with 7 mL of triethylamine (TEA) for 20 min, added dropwise into a solvent mixture containing 50 mL of acetone and 200 mL of distilled water, and stirred at a rate of 1300 rpm for 2 h. Finally, acetone and redundant TEA species were removed under a reduced pressure of 1.01 kPa via rotary evaporation and dialysis. The obtained SIS powder was then dispersed in the PU emulsion at a mass fraction of 42.9%, and stirred at room temperature for 2.5 h. The produced PU/SIS aqueous suspension were freeze-dried at a temperature of 70 °C for 24 h. The obtained PU/SIS foams were allowed to react with an EDC/NHS solution mixture in phosphate buffer solution (PBS, pH = 7.4) for 36 h. After washing the foams with saturated NaCl solution and distilled water, they were freeze-dried again and sterilized using ethylene oxide (EO) gas.

### **In vitro adhesion tests**

For the overlapping shear test, lap shear joints between the PU/SIS and SIS ( $L \times W = 5 \text{ mm} \times 10 \text{ mm}$ ) were prepared (Fig. S1). The samples were clamped to a tensile machine (AG-10TA, Shimadzu) with a shearing velocity of 20 mm/min. The adhesive shear strength was calculated with the following equation (3):

$$\text{Adhesive shear strength} = \frac{\text{Maximum Force}}{\text{Junction contact area}} \quad (3)$$

### **Hemocompatibility assay**

Hemolysis test was carried out according to the ISO standard 10993:2018. Briefly, fresh venous blood samples from healthy adult New Zealand white rabbits were diluted to remove the debris and lysed red blood cells. The precipitation was then diluted with PBS to obtain a red blood cells (RBCs) suspension. The SPS and ECM-SPS samples were added into the RBCs suspension (300  $\mu\text{L}$ ) and incubated at 37°C for 60 min. Normal saline and distilled water were used as the positive and negative controls, respectively. After incubation, the samples were centrifuged, and the supernatant was measured under a wavelength of 545 nm.

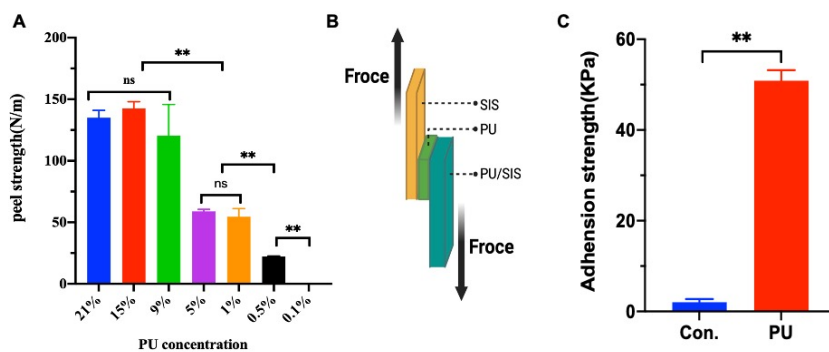

**Fig. S1.** (A) Peel strength of the PU emulsion of various concentrations on the SIS. (B) Schematic of the overlapping shear test. (C) The average adhesion shear strength of the bi-layered SIS composites.

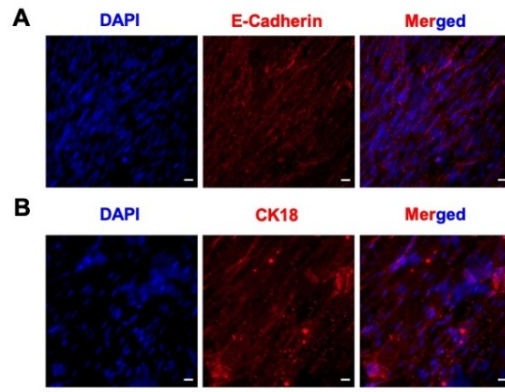

**Fig. S2.** Immunofluorescence staining of specific markers CK18 and E-Cadherin on the ECs cultured with the SIS for 7 days.

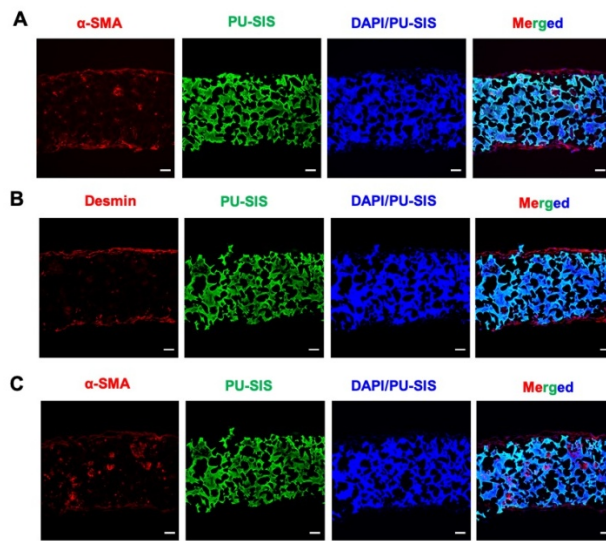

**Fig. S3.** Immunofluorescence staining of specific markers  $\alpha$ -SMA, desmin, and myosin on the SMCs cultured with the PU/SIS for 14 days.

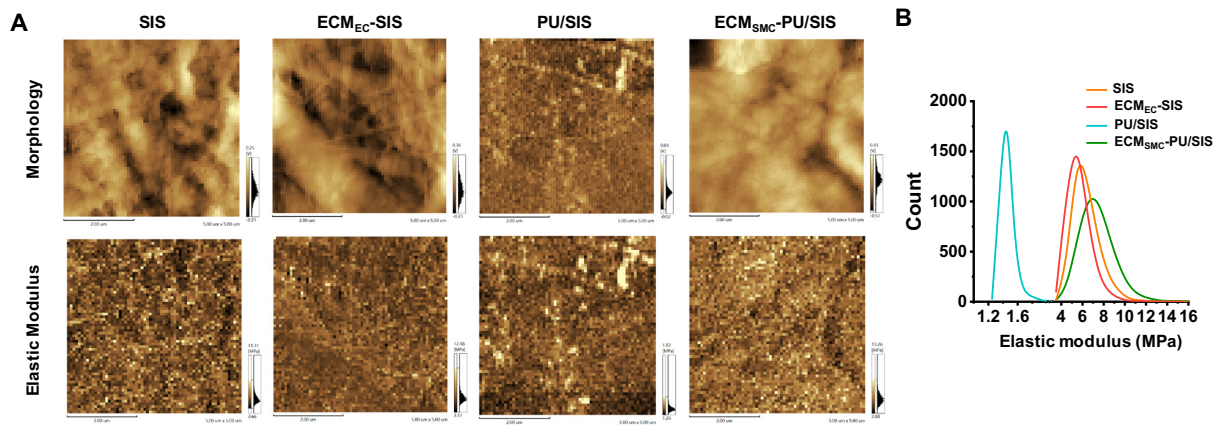

Fig. S4. (A) Representative maps of topography and elastic modulus obtained with standard AFM probe. (B) The distribution of elastic modulus in the ECM<sub>EC</sub>-SIS and ECM<sub>SMC</sub>-PU/SIS scaffolds detected by atomic force microscope.

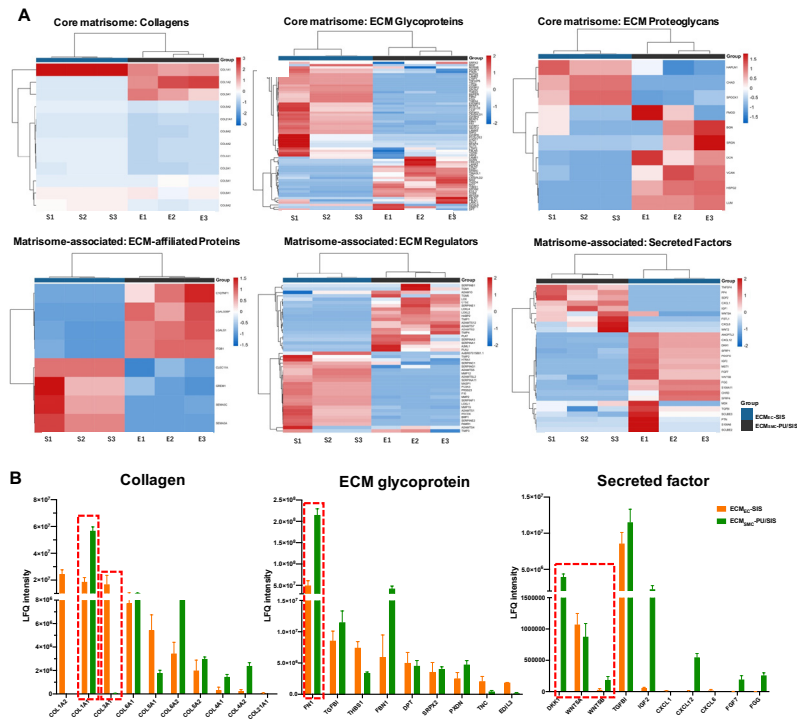

**Fig. S5.** (A) Matrisome protein relative quantitative comparison between the ECM<sub>EC</sub>-SIS and ECM<sub>SMC</sub>-PU/SIS. Results showed the fold-change (FC) in protein detection levels normalized to the mean of all samples in log<sub>2</sub> scale. (B) Comparison of matrisome proteins derived from the ECM<sub>EC</sub>-SIS and ECM<sub>SMC</sub>-PU/SIS.



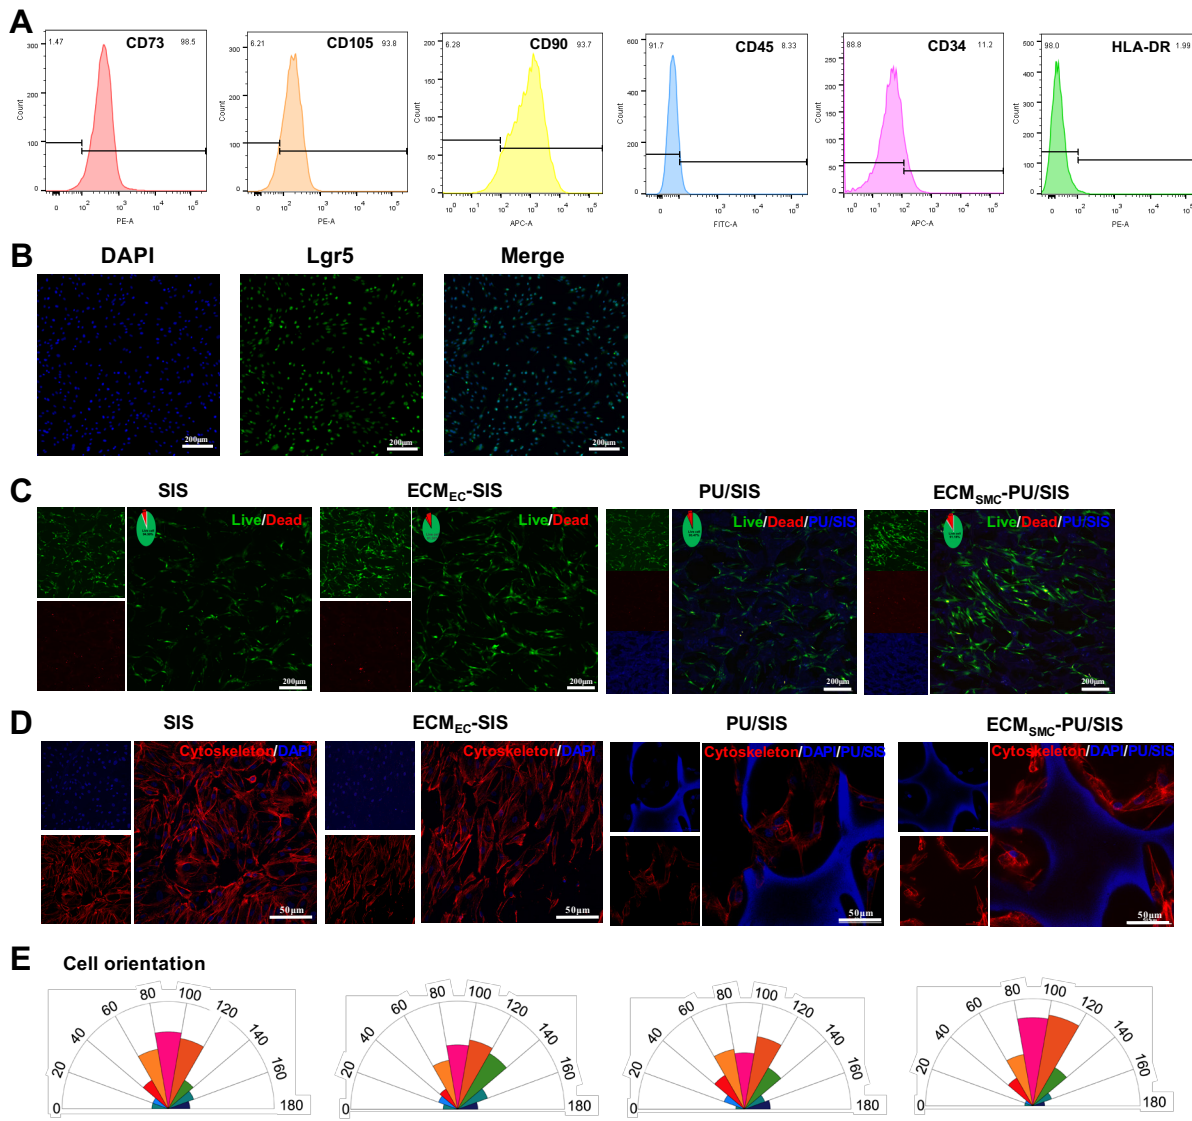

**Fig. S6.** (A) Flow cytometry analysis of the MSCs. (B) Flow cytometry analysis of the MSCs. (B) Expression of Lgr5 in the MSCs as observed by immunofluorescence staining (scale bar = 200  $\mu$ m). (C) Calcein-AM/PI staining of the live/dead cells on the ECM<sub>EC</sub>-SIS and ECM<sub>SMC</sub>-PU/SIS after 3 days of culture (green: viable cells; red: dead cells). Inside the white frame is the proportion of the live/dead cells. The pie chart represented the proportion of live and dead cells. (D) Rhodamine phalloidin/DAPI staining revealed cytoskeletal morphology of the MSCs on the ECM<sub>EC</sub>-SIS and ECM<sub>SMC</sub>-PU/SIS. (E) The orientation of the MSCs on the ECM<sub>EC</sub>-SIS and ECM<sub>SMC</sub>-PU/SIS were indicated by the angles between the cell long axis and horizontal line. The number on the axis represented the angle. The sector size in the pie chart represents the distribution of cell angles.

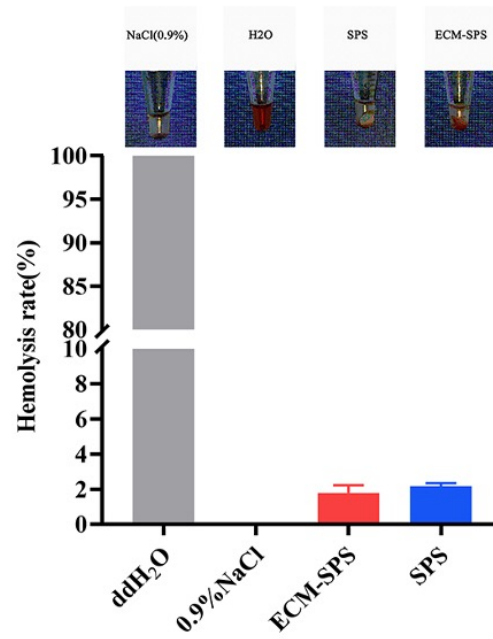

**Fig. S7.** Hemocompatibility of the SPS and ECM-SPS as determined by a hemolysis test.

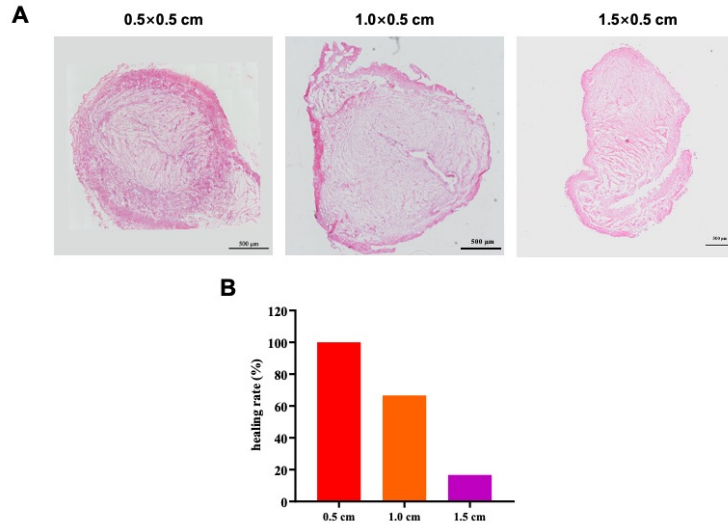

**Fig. S8.** (A) Cross-sections of H&E stained reconstructed uterine segments; (B) Statistical analysis of the self-healing rate.

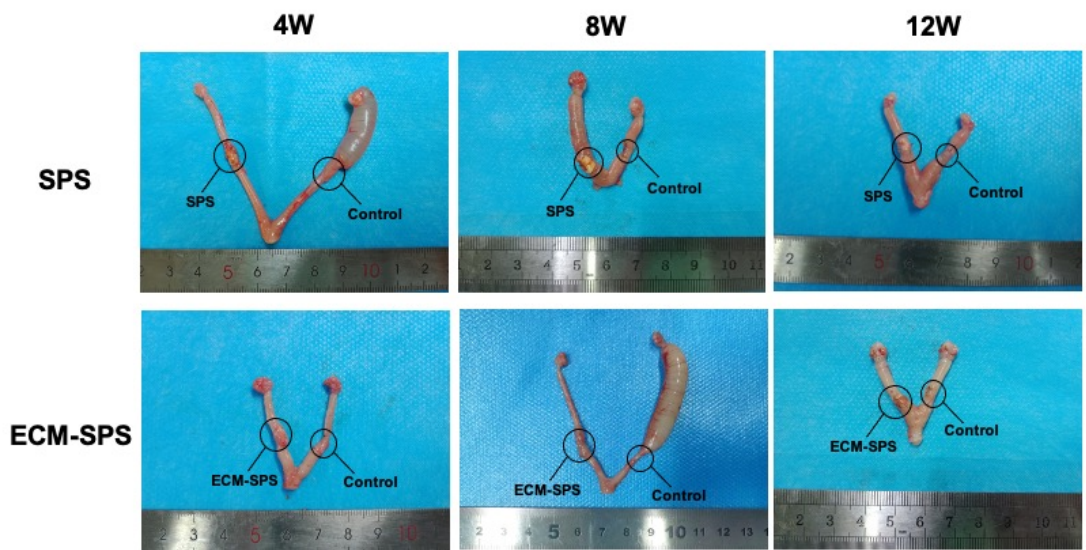

Fig. S9. Gross view of the regenerated uterine horns.

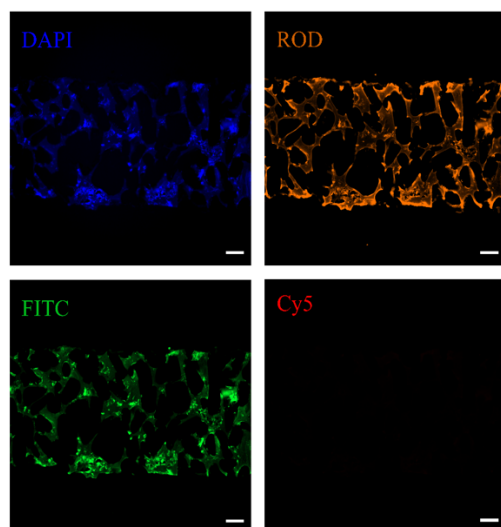

**Fig. S10.** Autofluorescence intensity of PU/SIS under various excitation conditions (bar=50 $\mu$ m).

**Table S1** Sequences of PCR primers

| Primers                          | Sequence (5' to 3')  |
|----------------------------------|----------------------|
| <i>CK18-F</i>                    | AAATCCGGGAGCACTTGGAG |
| <i>CK18-R</i>                    | CAATCTGCAGAACGATGCGG |
| <i>E-Cadherin-F</i>              | GCTGGACCGAGAGAGTTTCC |
| <i>E-Cadherin-R</i>              | CAAAATCCAAGCCCCTGGTG |
| <i><math>\alpha</math>-SMA-F</i> | CACGATGTACCCTGGGATCG |
| <i><math>\alpha</math>-SMA-R</i> | GCCGATCCACACCGAGTATT |
| <i>Myosin-F</i>                  | AGCACCGTGTCTTATGGTGA |
| <i>Myosin-R</i>                  | ATTTGCCGAATCGGGAGGAG |
| <i>GAPDH-F</i>                   | GTCAAGGCTGAGAACGGGAA |
| <i>GAPDH-R</i>                   | AAATGAGCCCCAGCCTTCTC |

**Data S1** The original data of Figs.3C &3D

| Group                                         | ECM <sub>EC</sub> -SIS(%) | ECM <sub>SMC-PU</sub> /SIS(%) |
|-----------------------------------------------|---------------------------|-------------------------------|
| Core Matrisome: Collagens                     | 3.83                      | 3.83                          |
| Core Matrisome: Proteoglycans                 | 2.13                      | 2.13                          |
| Core Matrisome: ECM glycoproteins             | 20.43                     | 20.43                         |
| Matrisome-associated: ECM regulators          | 11.49                     | 11.49                         |
| Matrisome-associated: Secrete factors         | 7.23                      | 7.23                          |
| Matrisome-associated: ECM affiliated proteins | 2.13                      | 2.13                          |
| Other                                         | 52.77                     | 52.77                         |

Data S2 The original data of Figs.3E & S5

| Protein  | E 1      | E 2      | E 3      | S 1       | S 2       | S 3       |
|----------|----------|----------|----------|-----------|-----------|-----------|
| COL1A1   | 17711000 | 16105000 | 22213000 | 60113000  | 55087000  | 40422000  |
| COL1A2   | 27678000 | 24495000 | 21417000 | 0         | 0         | 0         |
| COL21A1  | 95019    | 675      | 57735    | 0         | 0         | 0         |
| COL3A1   | 17959000 | 9581300  | 22955000 | 0         | 0         | 0         |
| COL4A1   | 620010   | 185480   | 160220   | 1694800   | 1328300   | 1454900   |
| COL4A2   | 366050   | 250890   | 125730   | 2709000   | 2228500   | 2425800   |
| COL5A1   | 6902000  | 4367400  | 5014600  | 2058900   | 1643800   | 1731300   |
| COL5A2   | 3018900  | 1387400  | 1579300  | 3181000   | 2889100   | 2864500   |
| COL6A1   | 5508800  | 6804300  | 10866000 | 10259000  | 10389000  | 10506000  |
| COL6A2   | 2730100  | 3074800  | 4534900  | 8796500   | 9180600   | 8868300   |
| COL2A1   | 0        | 0        | 0        | 889430    | 1275700   | 1424800   |
| COL8A2   | 0        | 0        | 0        | 14193     | 0         | 11249     |
| BMPER    | 0        | 0        | 0        | 58810     | 85845     | 100530    |
| CILP     | 0        | 0        | 0        | 29810     | 14013     | 22463     |
| COMP     | 0        | 0        | 0        | 97529     | 115190    | 126720    |
| CRISPLD1 | 0        | 0        | 0        | 685800    | 423980    | 533360    |
| CRISPLD2 | 382110   | 409530   | 467200   | 308200    | 257070    | 261190    |
| DPT      | 6846300  | 4656800  | 3536300  | 5522300   | 4055000   | 4124100   |
| EDIL3    | 1846400  | 1863700  | 1897600  | 313390    | 71552     | 180770    |
| EFEMP2   | 57004    | 200990   | 302380   | 1709700   | 966170    | 1295400   |
| FBLN1    | 402120   | 515160   | 982460   | 272720    | 154630    | 154570    |
| FBLN5    | 150500   | 200070   | 212960   | 254570    | 221750    | 262240    |
| FBN1     | 10011000 | 3565000  | 4285000  | 49261000  | 38954000  | 52322000  |
| FBN2     | 0        | 0        | 0        | 632430    | 936850    | 1220900   |
| FGG      | 920.54   | 1478.2   | 2021.3   | 211280    | 282400    | 263670    |
| FN1      | 48146000 | 39446000 | 61399000 | 231480000 | 206640000 | 222620000 |
| IGFALS   | 404040   | 88423    | 100340   | 162070    | 262990    | 160700    |
| IGFBP2   | 0        | 0        | 0        | 2373300   | 2511100   | 3209000   |
| IGFBP3   | 572070   | 506430   | 302000   | 1087700   | 873810    | 975710    |
| IGFBP4   | 0        | 0        | 0        | 3749700   | 2530000   | 2438200   |
| IGFBP5   | 59393    | 302340   | 253880   | 1319600   | 1033900   | 804220    |
| IGFBP6   | 0        | 0        | 0        | 1025900   | 166220    | 952460    |
| IGFBP7   | 123860   | 558830   | 634710   | 6646600   | 5016400   | 5385400   |
| LAMA5    | 10864    | 18679    | 13921    | 191330    | 153350    | 295460    |
| LAMB1    | 216190   | 792260   | 498530   | 332430    | 522050    | 46550     |
| LAMB2    | 18425    | 8505.6   | 19535    | 388660    | 374240    | 461140    |
| LAMC1    | 920780   | 1013600  | 1967600  | 1492500   | 865740    | 1061600   |
| MATN2    | 0        | 0        | 0        | 221680    | 203360    | 272560    |
| MFAP2    | 108240   | 72042    | 74715    | 861040    | 511000    | 765920    |
| MFAP4    | 21702    | 14307    | 14622    | 137300    | 20810     | 58998     |
| MFAP5    | 0        | 0        | 0        | 671960    | 436600    | 566060    |
| MXRA8    | 22289    | 0        | 15872    | 28843     | 19478     | 28730     |
| PCOLCE   | 94718    | 373860   | 305920   | 7175300   | 3661900   | 5232100   |
| PCOLCE2  | 0        | 0        | 0        | 8617.6    | 1529.9    | 0         |
| PXDN     | 3239400  | 2903000  | 1480400  | 5478700   | 4388400   | 5323700   |
| SLIT2    | 0        | 0        | 0        | 3421500   | 2074600   | 3332400   |
| SLIT3    | 0        | 0        | 0        | 4326      | 0         | 29036     |
| SPON1    | 0        | 0        | 0        | 61163     | 66635     | 48300     |
| SPP2     | 17750    | 4098.8   | 2227.6   | 495750    | 411030    | 423840    |
| SRPX     | 343450   | 1011800  | 1195000  | 2998700   | 1516100   | 2041200   |
| SRPX2    | 1965000  | 3801100  | 4956100  | 4447400   | 3843400   | 3812800   |
| SVEP1    | 0        | 0        | 0        | 184120    | 31528     | 135440    |
| TGFBI    | 6866200  | 8985300  | 9857200  | 13607000  | 10460000  | 9488500   |
| THBS1    | 8261300  | 6358500  | 7688500  | 3598300   | 3317500   | 4845200   |
| THBS2    | 485690   | 989190   | 644770   | 2285000   | 2785100   | 2326500   |
| THBS4    | 0        | 0        | 0        | 723210    | 1002200   | 1086900   |
| TNC      | 1214600  | 2571700  | 2492100  | 636800    | 364680    | 153990    |
| TNFAIP6  | 0        | 0        | 0        | 863950    | 835760    | 735060    |
| TSKU     | 0        | 0        | 0        | 250870    | 244710    | 213790    |
| AGRN     | 20533    | 108540   | 26252    | 0         | 0         | 0         |
| CRELD1   | 3038.6   | 37407    | 18671    | 0         | 0         | 0         |
| DMBT1    | 5585.1   | 4157.9   | 0        | 0         | 0         | 0         |
| ECM1     | 78411    | 121340   | 111870   | 0         | 0         | 0         |
| FBLN2    | 0        | 0        | 0        | 0         | 0         | 0         |
| FBLN7    | 0        | 2099     | 5417.6   | 0         | 0         | 0         |
| GAS6     | 15358    | 13005    | 15955    | 0         | 0         | 0         |
| LAMA2    | 2298.4   | 13716    | 5364.7   | 0         | 0         | 0         |
| LTBP1    | 30473    | 38751    | 60317    | 3118500   | 3020700   | 2915600   |
| LTBP2    | 0        | 15500    | 8631.4   | 28206     | 14103     | 83603     |
| MFGE8    | 537380   | 420010   | 498170   | 0         | 0         | 0         |
| MGP      | 3027.1   | 13078    | 2193.9   | 0         | 1358800   | 0         |
| NID1     | 1633800  | 871360   | 1644000  | 0         | 0         | 0         |
| NID2     | 127370   | 316580   | 449830   | 0         | 0         | 0         |
| SMOC2    | 0        | 0        | 6555.2   | 541030    | 386810    | 593300    |
| SPARC    | 710500   | 1087000  | 1026000  | 0         | 0         | 0         |
| SPON2    | 0        | 0        | 0        | 0         | 0         | 0         |
| THSD4    | 547110   | 361290   | 853650   | 0         | 0         | 0         |
| TINAGL1  | 488810   | 1428600  | 1147000  | 13888     | 0         | 0         |



|                |                     |         |         |         |          |          |          |
|----------------|---------------------|---------|---------|---------|----------|----------|----------|
| Proteoglycans  | BGN                 | 1416100 | 2564700 | 3057300 | 2104500  | 1426100  | 1420700  |
|                | CHAD                | 6407.9  | 11096   | 8573.1  | 544030   | 677220   | 791770   |
|                | DCN                 | 2717700 | 1379300 | 1989000 | 128230   | 57409    | 38961    |
|                | FMOD                | 680670  | 572890  | 467970  | 559370   | 492030   | 407210   |
|                | HAPLN1              | 37046   | 16944   | 20172   | 59849    | 50428    | 78927    |
|                | HSPG2               | 3756400 | 4844200 | 5007000 | 0        | 0        | 0        |
|                | SPOCK1              | 25917   | 53081   | 236810  | 778150   | 1106000  | 490230   |
|                | SRGN                | 0       | 0       | 0       | 0        | 0        | 0        |
|                | VCAN                | 677800  | 1301200 | 1141000 | 181880   | 71495    | 160510   |
|                | LUM                 | 7498500 | 7401500 | 8164500 | 369090   | 358000   | 357790   |
|                | CM affiliated prote | C1QTNF1 | 32068   | 19654   | 41440    | 0        | 0        |
| CLEC11A        |                     | 132970  | 119360  | 127070  | 172990   | 173450   | 31465    |
| GREM1          |                     | 795850  | 1385500 | 460670  | 6055100  | 3721800  | 5427400  |
| LGALS1         |                     | 6195500 | 5893900 | 6646100 | 1381300  | 1125400  | 1301300  |
| LGALS3BP       |                     | 0       | 0       | 0       | 0        | 0        | 0        |
| SEMA3C         |                     | 247300  | 334290  | 496920  | 12019000 | 7833300  | 10556000 |
| SEMA3A         |                     | 0       | 0       | 0       | 789620   | 614920   | 778250   |
| ITGB1          |                     | 241450  | 224900  | 239420  | 77104    | 58607    | 97910    |
| A2ML1          |                     | 17926   | 6480    | 5821.1  | 0        | 0        | 0        |
| ADAMTS1        |                     | 50068   | 86005   | 57251   | 7035800  | 3983900  | 5184400  |
| ECM regulators | ADAMTS12            | 0       | 0       | 0       | 0        | 0        | 0        |
|                | ADAMTS2             | 54264   | 38767   | 59431   | 0        | 0        | 26334    |
|                | ADAMTS4             | 87304   | 151220  | 109080  | 256780   | 63950    | 98794    |
|                | ADAMTS5             | 3041.9  | 3733.5  | 3420    | 39077    | 53262    | 84947    |
|                | ADAMTS7             | 6465.6  | 7118.8  | 11496   | 0        | 0        | 0        |
|                | BMP1                | 53188   | 203030  | 275190  | 2569600  | 1788200  | 2247200  |
|                | CTSZ                | 30835   | 85778   | 71812   | 0        | 0        | 0        |
|                | HABP2               | 19260   | 20929   | 19817   | 0        | 0        | 0        |
|                | LOX                 | 5601900 | 9095100 | 8406000 | 5384200  | 4233800  | 5544800  |
|                | LOXL2               | 4559000 | 5945700 | 4904100 | 1131700  | 1007300  | 964900   |
|                | LOXL4               | 50123   | 57626   | 33771   | 0        | 0        | 0        |
|                | MASP1               | 0       | 5961.7  | 3713.5  | 5923500  | 4862000  | 8957500  |
|                | MMP2                | 4230800 | 4823000 | 6241200 | 25871000 | 24411000 | 24688000 |
|                | PLAT                | 1140300 | 1100000 | 180360  | 0        | 0        | 0        |
|                | PLAU                | 87874   | 28123   | 36887   | 0        | 0        | 0        |
|                | PRSS23              | 40805   | 33407   | 55346   | 2342500  | 1877900  | 2362900  |
|                | SERPINA1            | 54662   | 39970   | 24934   | 0        | 0        | 0        |
|                | SERPINA3            | 1975.9  | 2077.8  | 0       | 0        | 0        | 0        |
|                | SERPINB1            | 0       | 0       | 0       | 0        | 0        | 0        |
|                | SERPINE1            | 4388700 | 7079900 | 5238300 | 2449800  | 2064500  | 2457100  |
|                | SERPINE2            | 221220  | 312590  | 167100  | 6188000  | 4560300  | 5020100  |
|                | SERPINF1            | 6551.3  | 0       | 13328   | 1817900  | 1759400  | 850140   |
|                | SERPING1            | 19281   | 55883   | 35529   | 80404    | 85675    | 76591    |
|                | TGM1                | 0       | 24168   | 9212.1  | 0        | 0        | 0        |
|                | TGM5                | 6848.5  | 0       | 5429.2  | 0        | 0        | 0        |
|                | TIMP1               | 1537400 | 1409600 | 1289500 | 0        | 0        | 0        |
|                | TIMP2               | 479260  | 624370  | 930160  | 2270600  | 1151000  | 1298200  |
|                | TIMP3               | 1400300 | 1474200 | 813630  | 1455000  | 1065500  | 1189400  |
|                | TIMP4               | 221.18  | 98.469  | 295.09  | 0        | 0        | 0        |
|                | AABR07015881.1      | 0       | 0       | 0       | 5412.2   | 18842    | 17031    |
|                | ADAM10              | 74849   | 63243   | 44799   | 9915.7   | 52694    | 0        |
|                | ADAMTSL2            | 0       | 0       | 0       | 7297.1   | 8332.8   | 6804.7   |
|                | F10                 | 0       | 0       | 0       | 193040   | 148690   | 103260   |
|                | HTRA1               | 2356400 | 2044800 | 1710300 | 3464000  | 2581700  | 2665700  |
|                | LOXL1               | 0       | 0       | 0       | 383930   | 352500   | 364920   |
|                | MMP12               | 0       | 0       | 0       | 667400   | 891740   | 881080   |
|                | MMP19               | 121510  | 84917   | 80629   | 378630   | 286380   | 345260   |
|                | PAMR1               | 0       | 0       | 0       | 271060   | 180130   | 108610   |
|                | PCSK5               | 0       | 0       | 0       | 180380   | 151110   | 100790   |
|                | PDCC6               | 38931   | 24251   | 25225   | 550970   | 329960   | 530020   |
| SERPINA11      | 0                   | 0       | 0       | 66570   | 71265    | 101490   |          |
| SERPINC1       | 47165               | 0       | 5656.9  | 66040   | 59521    | 76654    |          |
| Secret factors | CXCL1               | 12190   | 13912   | 9684.6  | 0        | 0        | 0        |
|                | CXCL12              | 0       | 18571   | 7951    | 617410   | 512830   | 528080   |
|                | CXCL6               | 14184   | 36004   | 0       | 0        | 0        | 0        |
|                | FGF7                | 0       | 3724    | 478.49  | 263340   | 157520   | 161270   |
|                | FGG                 | 920.54  | 1478.2  | 2021.3  | 211280   | 282400   | 263670   |
|                | FSTL1               | 0       | 0       | 0       | 0        | 0        | 0        |
|                | IGF1                | 4227.7  | 2692.9  | 2103.9  | 0        | 0        | 0        |
|                | IGF2                | 46719   | 67554   | 60990   | 2822500  | 1958700  | 2035000  |
|                | MDK                 | 121660  | 207470  | 127780  | 443500   | 5022.2   | 316700   |
|                | PDGFC               | 24810   | 44843   | 28656   | 318530   | 240550   | 377530   |
|                | PF4                 | 2314    | 0       | 3956.5  | 0        | 0        | 0        |
|                | PTN                 | 12775   | 75182   | 26302   | 1507100  | 156240   | 1450300  |
|                | S100A11             | 447530  | 380890  | 486860  | 4399400  | 5605300  | 4995400  |
|                | SCUBE3              | 18792   | 10794   | 29342   | 102830   | 43724    | 49931    |
|                | SDF2                | 0       | 0       | 0       | 0        | 0        | 0        |
|                | SFRP1               | 139250  | 324810  | 113860  | 1729500  | 1357600  | 1223000  |
|                | TGFB1               | 6866200 | 8985300 | 9857200 | 13607000 | 10460000 | 9488500  |
|                | TNFSF4              | 7528.3  | 6054.9  | 9911    | 0        | 0        | 0        |
|                | WNT2                | 0       | 0       | 0       | 0        | 0        | 0        |
|                | WNT5A               | 893490  | 1247500 | 1071500 | 1119500  | 755380   | 600870   |
|                | WNT5B               | 6071    | 30906   | 45945   | 249650   | 153290   | 171720   |
|                | ANGPTL2             | 0       | 0       | 0       | 1815600  | 1482000  | 1478800  |
|                | CHRD                | 0       | 0       | 0       | 9459.7   | 30795    | 5358.3   |
|                | DKK1                | 0       | 0       | 0       | 4424100  | 3700400  | 5006800  |
|                | MST1                | 0       | 0       | 0       | 538320   | 391660   | 398420   |
|                | S100A6              | 0       | 0       | 0       | 1536100  | 14418    | 1947.9   |
|                | SCUBE2              | 0       | 0       | 0       | 11275    | 0        | 10261    |
|                | SFRP4               | 0       | 0       | 0       | 10224    | 21435    | 14039    |

|                |         |         |         |          |          |          |
|----------------|---------|---------|---------|----------|----------|----------|
| AABR07049085.1 | 0       | 0       | 0       | 0        | 8375.2   | 7872.3   |
| AABR07073181.1 | 0       | 0       | 0       | 3585100  | 3314500  | 3688800  |
| AC115277.1     | 0       | 0       | 0       | 166760   | 220650   | 0        |
| ALB            | 0       | 0       | 0       | 110900   | 77118    | 571710   |
| AMH            | 0       | 0       | 0       | 22054    | 27266    | 27920    |
| ANDPRO         | 0       | 0       | 0       | 0        | 1334.2   | 2773.4   |
| APOM           | 252430  | 55127   | 363760  | 449100   | 1160700  | 1381100  |
| ARPC1B         | 177480  | 291170  | 299360  | 216120   | 277360   | 287590   |
| BET1           | 48338   | 10116   | 29332   | 545060   | 134510   | 315080   |
| C1GALT1C1      | 0       | 0       | 0       | 56598    | 35826    | 54309    |
| C1QTNF3        | 0       | 0       | 0       | 53306    | 107450   | 52270    |
| C1R            | 40342   | 68193   | 39688   | 138450   | 179630   | 143120   |
| C6             | 4471    | 0       | 2111.4  | 223020   | 204020   | 229990   |
| C7             | 0       | 0       | 0       | 20988    | 586550   | 608980   |
| C8B            | 0       | 0       | 0       | 880280   | 526710   | 698500   |
| CCN1           | 1211900 | 1304500 | 1684600 | 8006500  | 5069200  | 7024000  |
| CCN2           | 145180  | 203040  | 165110  | 3037100  | 2592500  | 4453900  |
| CD44           | 186690  | 245420  | 179820  | 82718    | 137740   | 90887    |
| CDC42          | 351640  | 349190  | 349190  | 746570   | 839910   | 902410   |
| CLEC11A        | 132970  | 119360  | 127070  | 172990   | 173450   | 31465    |
| CNBP           | 25067   | 71955   | 66154   | 220620   | 411310   | 196570   |
| CNMD           | 0       | 0       | 0       | 65473    | 53562    | 71540    |
| COMT           | 298570  | 414960  | 400220  | 323160   | 258300   | 293830   |
| COPS3          | 68373   | 70435   | 67535   | 50453    | 38264    | 0        |
| COX6B1         | 17458   | 26947   | 150570  | 147580   | 187810   | 195740   |
| CYTL1          | 0       | 0       | 0       | 63168    | 59823    | 75200    |
| DNAJB9         | 0       | 0       | 0       | 191020   | 113650   | 236480   |
| DNAJC19        | 0       | 0       | 0       | 134660   | 5166.4   | 144220   |
| DPM3           | 0       | 0       | 0       | 0        | 45350    | 44852    |
| DSC1           | 125740  | 118620  | 118900  | 9875.7   | 23379    | 55302    |
| DUSP3          | 57473   | 97306   | 43960   | 169400   | 249370   | 290010   |
| DYNLT1         | 23260   | 29089   | 35767   | 97862    | 137770   | 102130   |
| EGFR           | 0       | 0       | 0       | 19977    | 13663    | 13983    |
| ENPP2          | 0       | 0       | 0       | 425730   | 201100   | 422910   |
| ERGIC1         | 92838   | 23261   | 58617   | 65464    | 69774    | 67054    |
| ESD            | 37572   | 34786   | 32607   | 106200   | 15243    | 13565    |
| ETFBKMT        | 0       | 0       | 0       | 270580   | 119810   | 0        |
| F11            | 0       | 0       | 0       | 457650   | 333490   | 351430   |
| FAM115C        | 0       | 0       | 0       | 1003500  | 48153    | 1030300  |
| FHL1           | 31242   | 44516   | 64013   | 1138900  | 661330   | 861020   |
| FKBP11         | 138850  | 15094   | 36328   | 34356    | 44775    | 37541    |
| FMOD           | 680670  | 572690  | 467970  | 559370   | 492030   | 407210   |
| FRZB           | 0       | 0       | 0       | 21091    | 0        | 14543    |
| FSCN1          | 143450  | 189960  | 191620  | 305070   | 240690   | 187250   |
| FST            | 0       | 0       | 0       | 54006    | 58615    | 28421    |
| GNB1           | 405970  | 122720  | 317490  | 538600   | 603190   | 499220   |
| GNB2           | 34702   | 58098   | 28967   | 12646    | 265290   | 19819    |
| GNPNAT1        | 0       | 0       | 0       | 198560   | 233940   | 233770   |
| GPX3           | 5176.7  | 90326   | 21376   | 1596900  | 1643100  | 1568200  |
| GPX4           | 140660  | 118980  | 174860  | 169850   | 213050   | 273310   |
| GPX7           | 8767.8  | 8533.7  | 11671   | 38095    | 34898    | 35903    |
| HBA-A1         | 0       | 0       | 0       | 213980   | 211950   | 407410   |
| HBB            | 103020  | 133680  | 131100  | 143800   | 23865    | 13321    |
| HBE1           | 35520   | 41196   | 22463   | 601180   | 354970   | 531950   |
| HGF            | 0       | 0       | 0       | 4370700  | 1272200  | 1515400  |
| IGF2           | 46719   | 67554   | 60990   | 2822500  | 1958700  | 2035000  |
| ISLR           | 0       | 0       | 0       | 25957    | 44850    | 38669    |
| LANCL1         | 28372   | 49825   | 32708   | 10409    | 65852    | 48098    |
| LECT2          | 0       | 0       | 0       | 212360   | 216530   | 205420   |
| LIMS1          | 283740  | 201930  | 226610  | 301960   | 220010   | 245120   |
| LMAN2          | 105950  | 70186   | 55914   | 41740    | 27217    | 40672    |
| LMCD1          | 56638   | 128410  | 96668   | 36470    | 85930    | 18803    |
| LOC100909840   | 0       | 0       | 0       | 120140   | 72164    | 70388    |
| LOC103694877   | 0       | 0       | 0       | 605110   | 815180   | 796540   |
| LOC108348085   | 0       | 0       | 0       | 87326    | 55521    | 0        |
| LOC305806      | 0       | 0       | 0       | 32630    | 31617    | 34045    |
| LPL            | 0       | 42567   | 0       | 29972    | 14002    | 10743    |
| LRRC57         | 0       | 0       | 0       | 159410   | 65105    | 70037    |
| LSM12          | 42121   | 25198   | 41359   | 106890   | 78196    | 69611    |
| LTBP1          | 30473   | 38751   | 60317   | 3118500  | 3020700  | 2915600  |
| LTBP2          | 0       | 15500   | 8631.4  | 28206    | 14103    | 83603    |
| LTBP3          | 0       | 0       | 0       | 9688     | 67612    | 73869    |
| LTBP4          | 0       | 0       | 0       | 53423    | 58232    | 69361    |
| MANF           | 8505    | 58803   | 41041   | 259580   | 243420   | 195250   |
| METAP1         | 8615    | 2492.2  | 39800   | 245910   | 224560   | 249670   |
| NEWGENE_621351 | 0       | 0       | 0       | 52440000 | 61142000 | 52069000 |
| OLFML2A        | 0       | 0       | 0       | 106590   | 105540   | 253160   |
| ORMDL1         | 53144   | 20945   | 18316   | 169770   | 74283    | 79673    |

Other

|             |         |         |         |         |         |         |
|-------------|---------|---------|---------|---------|---------|---------|
| PAM         | 0       | 0       | 0       | 108920  | 394930  | 335490  |
| PBLD1       | 0       | 0       | 0       | 35140   | 27026   | 25136   |
| PDGFRL      | 7046.9  | 6558    | 8334    | 151570  | 148610  | 94722   |
| PIGR        | 0       | 0       | 0       | 60159   | 31382   | 14181   |
| PRNP        | 0       | 0       | 0       | 136500  | 117260  | 593270  |
| PSMB2       | 54502   | 153900  | 179490  | 2979.9  | 39718   | 42679   |
| PSME1       | 53647   | 116070  | 33905   | 121390  | 286570  | 131420  |
| PTP4A2      | 16091   | 111560  | 71798   | 306300  | 172020  | 367560  |
| QPCT        | 2599.1  | 11160   | 7491    | 99906   | 59450   | 90516   |
| QSOX1       | 312220  | 270070  | 181850  | 6686700 | 4559000 | 6154700 |
| RAB29       | 0       | 0       | 0       | 59923   | 77769   | 78368   |
| RAB5B       | 77374   | 22656   | 71015   | 78536   | 80795   | 101510  |
| RAB5C       | 853610  | 903860  | 1037800 | 1461600 | 1067200 | 1188300 |
| RAC1        | 0       | 175330  | 52683   | 2844800 | 2354800 | 2661700 |
| RACK1       | 620680  | 634670  | 761070  | 965950  | 918270  | 729420  |
| RAE1        | 0       | 0       | 0       | 69425   | 81739   | 82879   |
| RBM12       | 0       | 0       | 0       | 1463400 | 1289200 | 1389600 |
| RBX1        | 32283   | 24217   | 23017   | 0       | 31167   | 24929   |
| RHOG        | 47368   | 32232   | 60101   | 751310  | 812540  | 873230  |
| RNASE4      | 1719.4  | 1345.3  | 1754.4  | 937880  | 374940  | 703380  |
| RPN2        | 1734700 | 988030  | 1300400 | 46440   | 106330  | 79675   |
| RT1-A1      | 0       | 0       | 0       | 136450  | 161070  | 157530  |
| S GENE NAME | 0       | 0       | 0       | 0       | 0       | 0       |
| SCPEP1      | 105560  | 107700  | 39155   | 12966   | 81259   | 48008   |
| SEC13       | 267500  | 275720  | 239520  | 114160  | 118290  | 121910  |
| SPCS3       | 101490  | 49435   | 61874   | 159320  | 215900  | 213630  |
| SSR4        | 102640  | 146060  | 104850  | 45380   | 192480  | 85489   |
| STC1        | 14663   | 31077   | 14895   | 1570400 | 1661500 | 1055000 |
| TBL2        | 48654   | 38809   | 100060  | 147860  | 67625   | 143330  |
| TF          | 1746.9  | 5303.1  | 8578.2  | 522030  | 602120  | 487390  |
| TIAL1       | 24730   | 5308.1  | 3720    | 151520  | 92016   | 106750  |
| TIE1        | 0       | 0       | 0       | 145760  | 138590  | 118130  |
| TMED10      | 630300  | 368510  | 470470  | 244770  | 156250  | 279220  |
| TMED2       | 391530  | 184870  | 126650  | 51960   | 89315   | 76333   |
| TMED7       | 208000  | 113780  | 81580   | 64974   | 205690  | 61894   |
| TMED9       | 72631   | 30272   | 39704   | 112250  | 124490  | 71569   |
| TMEM214     | 44370   | 4919.7  | 5057.2  | 19977   | 31988   | 20813   |
| TNFRSF11B   | 25394   | 0       | 11172   | 230530  | 154230  | 180980  |
| TXNDC5      | 100440  | 207290  | 150660  | 73888   | 94040   | 70383   |
| UBE2D2      | 0       | 0       | 0       | 273110  | 382260  | 278490  |
| VDAC2       | 510170  | 435400  | 585290  | 650820  | 831910  | 696240  |
| VPS25       | 7381.9  | 13758   | 11338   | 16477   | 82105   | 14873   |
| WDFY1       | 13162   | 17945   | 50408   | 60214   | 57705   | 59371   |
| WDR1        | 1344700 | 1206600 | 1533700 | 4747400 | 6740200 | 4681200 |
| WDR45B      | 13147   | 14780   | 18709   | 106840  | 67426   | 96853   |
| YKT6        | 56178   | 74897   | 45926   | 19003   | 46336   | 0       |
| ABHD14B     | 20045   | 19266   | 13447   | 441340  | 350240  | 402780  |
| AIMP2       | 149130  | 129150  | 245580  | 0       | 0       | 0       |
| ALPI        | 3493.8  | 3226.7  | 2602.7  | 0       | 0       | 0       |
| ANOS1       | 0       | 15825   | 15858   | 0       | 0       | 0       |
| APOA1       | 29207   | 6632.5  | 13112   | 0       | 0       | 0       |
| APOC3       | 19970   | 0       | 1712.4  | 0       | 0       | 0       |
| APOE        | 68393   | 9378.9  | 4011.2  | 0       | 0       | 0       |
| ARMC10      | 13608   | 6851.6  | 4264.5  | 0       | 0       | 0       |
| ATP1B3      | 0       | 43579   | 56669   | 0       | 0       | 0       |
| ATP5MF      | 39809   | 27780   | 41509   | 0       | 0       | 0       |
| AZGP1       | 63387   | 53197   | 49242   | 0       | 0       | 0       |
| B2M         | 31765   | 65453   | 48252   | 0       | 0       | 0       |
| BCAS2       | 15983   | 14991   | 11219   | 0       | 0       | 0       |
| BDNF        | 0       | 0       | 0       | 0       | 0       | 0       |
| BID         | 2590.2  | 9529.1  | 5069.9  | 0       | 0       | 0       |
| BSG         | 128040  | 78708   | 87137   | 0       | 0       | 0       |
| C1orf53     | 0       | 0       | 0       | 0       | 0       | 0       |
| C1S         | 0       | 0       | 0       | 0       | 0       | 0       |
| C2          | 168030  | 0       | 76475   | 0       | 0       | 0       |
| C5orf51     | 16948   | 18374   | 4714.2  | 0       | 0       | 0       |
| CCL20       | 1184.7  | 924.43  | 593.72  | 0       | 0       | 0       |
| CD59        | 24532   | 22146   | 19637   | 0       | 0       | 0       |
| CDA         | 0       | 0       | 0       | 0       | 0       | 0       |
| CEP250      | 0       | 340740  | 676140  | 0       | 0       | 0       |
| CHI3L1      | 0       | 0       | 0       | 0       | 0       | 0       |
| CIAO1       | 30128   | 33115   | 38822   | 0       | 0       | 0       |
| CISD1       | 0       | 0       | 0       | 0       | 0       | 0       |
| CNPY2       | 51189   | 519650  | 149500  | 0       | 0       | 0       |
| COMMD10     | 0       | 43245   | 32132   | 0       | 0       | 0       |
| COMMD3      | 16988   | 15998   | 42617   | 0       | 0       | 0       |
| COMMD6      | 0       | 0       | 0       | 0       | 0       | 0       |
| COMMD9      | 0       | 0       | 0       | 0       | 0       | 0       |

other

|  |          |        |        |        |        |        |        |
|--|----------|--------|--------|--------|--------|--------|--------|
|  | CPSF4    | 10056  | 12789  | 14335  | 0      | 0      | 0      |
|  | CRTAP    | 306210 | 287420 | 258250 | 0      | 0      | 0      |
|  | CUTA     | 33488  | 38341  | 29211  | 0      | 0      | 0      |
|  | DCD      | 0      | 0      | 0      | 0      | 0      | 0      |
|  | DEFA3    | 2942.5 | 458.44 | 2293.2 | 0      | 0      | 0      |
|  | DKK3     | 3753.2 | 17034  | 2049.2 | 0      | 0      | 0      |
|  | DNAJC5   | 0      | 0      | 0      | 0      | 0      | 0      |
|  | DNASE1L1 | 1885.7 | 989.14 | 14208  | 0      | 0      | 0      |
|  | DNASE2B  | 17485  | 53751  | 23104  | 0      | 0      | 0      |
|  | DSC3     | 8204.3 | 11617  | 7164.1 | 0      | 0      | 0      |
|  | DYNLT3   | 55380  | 80587  | 46211  | 0      | 0      | 0      |
|  | ECRG4    | 11428  | 11426  | 3243.3 | 0      | 0      | 0      |
|  | EEF1E1   | 64838  | 91529  | 125690 | 0      | 0      | 0      |
|  | EIF3I    | 272450 | 242180 | 147990 | 0      | 32097  | 20790  |
|  | EIF6     | 37868  | 83534  | 117360 | 0      | 0      | 0      |
|  | EMC10    | 0      | 0      | 0      | 0      | 0      | 0      |
|  | EMC8     | 0      | 0      | 0      | 0      | 0      | 0      |
|  | EPDR1    | 0      | 0      | 0      | 0      | 0      | 0      |
|  | ERP44    | 233890 | 252280 | 235800 | 194310 | 542300 | 128920 |
|  | ETHE1    | 37879  | 61063  | 33666  | 0      | 0      | 0      |
|  | F3       | 5363.3 | 5047.2 | 4434   | 0      | 0      | 0      |
|  | FBLIM1   | 29430  | 12913  | 5298.2 | 0      | 0      | 0      |
|  | FHL2     | 472070 | 673440 | 597180 | 0      | 20960  | 0      |
|  | GET4     | 15208  | 7052.9 | 8025.1 | 0      | 0      | 0      |
|  | GLRX     | 79989  | 94029  | 67667  | 0      | 0      | 0      |
|  | GPLD1    | 2133.1 | 35883  | 8273.4 | 0      | 0      | 0      |
|  | GPNMB    | 29240  | 141310 | 116090 | 0      | 0      | 0      |
|  | GPX1     | 586360 | 596090 | 362120 | 129460 | 182700 | 113590 |
|  | GPX8     | 56808  | 36444  | 39066  | 0      | 0      | 0      |
|  | GRN      | 11273  | 19403  | 12875  | 0      | 0      | 0      |
|  | GSTP1    | 605420 | 709210 | 696130 | 0      | 0      | 0      |
|  | GYG1     | 45881  | 31177  | 24678  | 0      | 0      | 0      |
|  | HBA1     | 104000 | 71440  | 25159  | 0      | 0      | 0      |
|  | HIKESHI  | 13159  | 4210   | 4772.4 | 0      | 0      | 0      |
|  | HLA-A    | 429020 | 625350 | 417950 | 0      | 0      | 0      |
|  | HLA-B    | 175380 | 194630 | 152320 | 0      | 0      | 0      |
|  | HLA-C    | 190160 | 362480 | 280880 | 0      | 0      | 0      |
|  | HLA-E    | 0      | 0      | 0      | 0      | 0      | 0      |
|  | HLA-H    | 51550  | 36902  | 22774  | 0      | 0      | 0      |
|  | ICAM1    | 205220 | 111550 | 140960 | 0      | 0      | 0      |
|  | IFI30    | 0      | 0      | 0      | 0      | 0      | 0      |
|  | IGF2R    | 22509  | 24347  | 20113  | 0      | 0      | 0      |
|  | IGHA1    | 33411  | 45811  | 8260.4 | 0      | 0      | 0      |
|  | IGHA2    | 0      | 0      | 0      | 0      | 0      | 0      |
|  | IGHG1    | 119700 | 108050 | 85765  | 0      | 0      | 0      |
|  | IGIP     | 0      | 0      | 0      | 0      | 0      | 0      |
|  | IGKC     | 16336  | 47490  | 35106  | 0      | 0      | 0      |
|  | IGLC3    | 27941  | 17700  | 18099  | 0      | 0      | 0      |
|  | IKBKG    | 1305.3 | 1522   | 13113  | 0      | 0      | 0      |
|  | ITGB1    | 241450 | 224900 | 239420 | 77104  | 58607  | 97910  |
|  | ITGB3    | 18213  | 20507  | 99954  | 0      | 0      | 0      |
|  | ITGB5    | 0      | 0      | 0      | 0      | 0      | 0      |
|  | ITPA     | 39464  | 216440 | 166190 | 0      | 0      | 0      |
|  | LAMP1    | 11859  | 13705  | 9422.1 | 0      | 0      | 0      |
|  | LAMP2    | 277610 | 491610 | 361910 | 0      | 0      | 0      |
|  | LAMTOR2  | 19176  | 31023  | 0      | 0      | 0      | 0      |
|  | LDLR     | 56375  | 35215  | 32200  | 0      | 0      | 0      |
|  | LGMN     | 0      | 0      | 0      | 0      | 0      | 0      |
|  | LRP1     | 114080 | 141600 | 91693  | 0      | 0      | 0      |
|  | LRP10    | 24203  | 38181  | 11495  | 0      | 0      | 0      |
|  | LRP2     | 0      | 0      | 0      | 0      | 0      | 0      |
|  | LRSAM1   | 6240.4 | 5839.4 | 6374.3 | 0      | 0      | 0      |
|  | LTF      | 0      | 0      | 0      | 0      | 0      | 0      |
|  | LYZ      | 4812.2 | 0      | 1333.5 | 0      | 0      | 0      |
|  | MESD     | 0      | 0      | 0      | 0      | 0      | 0      |
|  | MIF      | 61853  | 183020 | 165490 | 0      | 0      | 0      |
|  | MMS19    | 26181  | 18056  | 17092  | 0      | 0      | 0      |
|  | MPZL1    | 21719  | 15860  | 11707  | 0      | 0      | 0      |
|  | MRC2     | 0      | 0      | 0      | 0      | 0      | 0      |
|  | MYCBP    | 15064  | 29497  | 13943  | 0      | 0      | 0      |
|  | NIT1     | 19956  | 29437  | 47895  | 0      | 0      | 0      |
|  | NUCB1    | 64385  | 139600 | 63533  | 0      | 0      | 0      |
|  | NUP43    | 43495  | 45561  | 46816  | 0      | 0      | 0      |
|  | OAF      | 34308  | 22396  | 7442.6 | 0      | 0      | 0      |
|  | PDOD6    | 38931  | 24251  | 25225  | 550970 | 329960 | 530020 |
|  | PFN1     | 232890 | 219690 | 174720 | 17382  | 22031  | 16485  |
|  | PFN2     | 142920 | 192640 | 160020 | 0      | 0      | 0      |
|  | PHF5A    | 5716.1 | 5666.5 | 7995.1 | 0      | 0      | 0      |
|  | PHPT1    | 43540  | 78604  | 98622  | 0      | 0      | 0      |
|  | PIP      | 14685  | 7592.8 | 10109  | 0      | 0      | 0      |
|  | PIP4P1   | 0      | 2824.2 | 7396.5 | 0      | 0      | 0      |
|  | PLAA     | 99979  | 113310 | 53890  | 0      | 0      | 0      |

other

|  |         |         |         |         |         |         |         |
|--|---------|---------|---------|---------|---------|---------|---------|
|  | PRDX3   | 220640  | 127830  | 254940  | 32906   | 34303   | 0       |
|  | PSAP    | 906570  | 464020  | 1030700 | 6996.1  | 0       | 0       |
|  | PSMB8   | 0       | 0       | 0       | 0       | 0       | 0       |
|  | PTRH2   | 0       | 0       | 0       | 0       | 0       | 0       |
|  | PTTG1P  | 3428    | 2187.7  | 2570    | 0       | 0       | 0       |
|  | RAB5A   | 53614   | 51841   | 40570   | 0       | 0       | 0       |
|  | RAC2    | 207820  | 109340  | 93166   | 0       | 0       | 0       |
|  | RARRES1 | 50895   | 109660  | 164200  | 0       | 0       | 0       |
|  | RARRES2 | 100730  | 305300  | 159460  | 0       | 0       | 0       |
|  | RBCK1   | 9573.9  | 9269.5  | 9636.6  | 0       | 0       | 0       |
|  | RDH11   | 31942   | 29198   | 6124.5  | 0       | 0       | 0       |
|  | RETN    | 9556.8  | 12254   | 5849.7  | 0       | 0       | 0       |
|  | RHOQ    | 5541.1  | 5533.3  | 6106    | 0       | 0       | 0       |
|  | RNASE7  | 18231   | 25168   | 13337   | 0       | 0       | 0       |
|  | RNF114  | 413.29  | 3833.6  | 3762.3  | 0       | 0       | 0       |
|  | SAA1    | 4811.6  | 3886.6  | 0       | 0       | 0       | 0       |
|  | SAA2    | 660.23  | 1319.4  | 756.13  | 0       | 0       | 0       |
|  | SCGB3A2 | 21159   | 4805.4  | 3201.2  | 0       | 0       | 0       |
|  | SEH1L   | 0       | 0       | 0       | 0       | 0       | 0       |
|  | SELENOF | 7208.9  | 24881   | 39248   | 0       | 0       | 0       |
|  | SELENOM | 0       | 0       | 0       | 0       | 0       | 0       |
|  | SIGMAR1 | 29991   | 30029   | 24372   | 0       | 0       | 0       |
|  | SLC3A1  | 0       | 0       | 0       | 0       | 0       | 0       |
|  | SNRNP40 | 0       | 0       | 0       | 0       | 0       | 0       |
|  | SOD3    | 13192   | 17178   | 9286.2  | 0       | 0       | 0       |
|  | SPP2    | 17750   | 4098.8  | 2227.6  | 495750  | 411030  | 423840  |
|  | SPRYD7  | 0       | 0       | 0       | 0       | 0       | 0       |
|  | SRM     | 98170   | 138320  | 102240  | 455210  | 355850  | 488900  |
|  | SRPRB   | 93735   | 87824   | 75153   | 0       | 0       | 0       |
|  | SRPX    | 343450  | 1011800 | 1195000 | 2998700 | 1516100 | 2041200 |
|  | SRPX2   | 1965000 | 3801100 | 4956100 | 4447400 | 3843400 | 3812800 |
|  | STC2    | 10328   | 14421   | 13586   | 0       | 0       | 0       |
|  | SUSD2   | 8963.6  | 2526.5  | 2735.4  | 0       | 0       | 0       |
|  | TBL1XR1 | 0       | 0       | 0       | 0       | 0       | 0       |
|  | TEX30   | 23465   | 12794   | 2405    | 0       | 0       | 0       |
|  | TFPI    | 0       | 31633   | 43830   | 0       | 0       | 0       |
|  | TFPI2   | 1234000 | 1001800 | 475740  | 0       | 0       | 0       |
|  | THY1    | 56535   | 28932   | 12175   | 0       | 0       | 0       |
|  | TMED3   | 21066   | 17753   | 19231   | 0       | 0       | 0       |
|  | TNPO3   | 14770   | 16600   | 11763   | 0       | 0       | 0       |
|  | TOMM22  | 86208   | 47928   | 93854   | 0       | 10983   | 0       |
|  | TOMM40  | 0       | 0       | 0       | 0       | 0       | 0       |
|  | TRIM25  | 35454   | 19157   | 18015   | 39068   | 39173   | 71328   |
|  | TRIP6   | 140930  | 36090   | 115490  | 0       | 0       | 0       |
|  | TRMT112 | 0       | 0       | 0       | 0       | 0       | 0       |
|  | TXN2    | 8422.3  | 10815   | 8403.2  | 0       | 0       | 0       |
|  | UBE2L6  | 0       | 0       | 0       | 0       | 0       | 0       |
|  | VASN    | 0       | 0       | 0       | 0       | 0       | 0       |
|  | WDR18   | 0       | 0       | 0       | 0       | 0       | 0       |
|  | WDR5    | 15325   | 19872   | 27719   | 0       | 0       | 0       |
|  | WDR77   | 24144   | 30179   | 22910   | 0       | 0       | 0       |
|  | WFDC11  | 1544500 | 280500  | 2477900 | 0       | 0       | 0       |

other
